# Supplementary material for: Reverse evolution leads to genotypic incompatibility despite functional and active site convergence
Source: eLife. 2015 Aug 14;4:e06492. doi: 10.7554/eLife.06492 (PMC4579389; doi:10.7554/eLife.06492)
Supplement: Figure 4—source data 1. — Fold-changes between the two backgrounds as well as p-values calculated according to the t-test are given. [a] Only mutations with an average >1.3-fold difference between backgrounds AND a p-value <0.05 are considered significant. Non-significant values are underlined. These belong to the ‘PANEL A’ series, which consists of mutations that are neutral in both cases. The only exception is i313F from PANEL C, which is significantly different from wtPTE, but not significantly different between wt- and neoPTE. DOI: http://dx.doi.org/10.7554/eLife.06492.012 [file elife06492s001.xlsx]

## Sheet: Fig. 4 - Source Data 1
	Figure 4 - Source Data 1
	Mutation	amino acid in
		each background			wtPTE/	T-test[a]
		wtPTE		neoPTE	neoPTE[a]	p-value
	PANEL A
	t45A	t		A	1.30342	0.0987076
	a80V	a		V	1.39028	0.0430946
	s102T	s		T	1.42662	0.0290717
	p135S	p		S	0.684073	0.029977
	y156H	y		H	0.953027	0.74291
	i274S	i		S	1.26432	0.316982
	m293K	m		K	0.689221	0.337611
	t341I	t		I	1.58892	0.01
	PANEL B
	l130M	l		M	0.645132	0.01
	s137T	s		T	1.95998	0.0311581
	m138I	m		I	2.16683	0.016016
	l140M	l		M	2.28295	0.0146534
	g174D	g		D	0.349513	1.1×10-4
	t199I	t		I	5.35357	3.0×10-5
	s269T	s		T	1.70865	0.01
	s308C	s		C	0.164792	1.5×10-5
	PANEL C
	k77E	k		E	1.58924	0.00535872
	s111R	s		R	1.71619	0.0252474
	e144V	e		V	1.66946	0.0178959
	v176M	v		M	1.86972	0.00596521
	l272M	l		M	1.58222	0.0324043
	f306M	f		M	0.13874	6.2×10-8
	i313F	i		F	1.67638	0.127982
	PANEL D
	a203E	a		E	0.0975722	0.00806585
	a204G	a		G	4.61721	0.00597191
	d233E	d		E	50.8151	2.7×10-5
	h254R	h		R	110	1.0×10-6
	s258N	s		N	0.180173	3.2×10-6
