# Supplementary material for: Reverse evolution leads to genotypic incompatibility despite functional and active site convergence
Source: eLife. 2015 Aug 14;4:e06492. doi: 10.7554/eLife.06492 (PMC4579389; doi:10.7554/eLife.06492)
Supplement: Figure 6—source data 1. — Fold-changes between the two backgrounds as well as p-values calculated according to the t-test are given. [a] Only mutations with an average >1.3-fold difference between backgrounds and a p-value <0.05 are considered significant. [b] Phosphotriesterase activity was too low to be determined in AE + R254h, but at least 10-fold reduced. DOI: http://dx.doi.org/10.7554/eLife.06492.015 [file elife06492s002.xlsx]

## Sheet: Fig. 6 - Source Data 1
	Figure 6 - Source Data 1
	Mutation	amino acid in
		each background			forward/	T-test[a]
		forward evo.		AE	AE[a]	p-value
	V130l	l		V	0.3	6.4×10-7
	I172t	t		I	0.2	3.6×10-4
	F271l	l		F	0.5	6.1×10-7
	R254h	h		R	>140[b]	/
