# Supplementary material for: Reverse evolution leads to genotypic incompatibility despite functional and active site convergence
Source: eLife. 2015 Aug 14;4:e06492. doi: 10.7554/eLife.06492 (PMC4579389; doi:10.7554/eLife.06492)
Supplement: Figure 6—source data 2. — Fold-changes between the two backgrounds as well as p-values calculated according to the t-test are given. [a] Only mutations with an average >1.3-fold difference between backgrounds and a p-value <0.05 are considered significant. Non-significant values are underlined. Note that the effect of m293K, which causes a significant increase in AE, is statistically not significant between wtPTE and AE. DOI: http://dx.doi.org/10.7554/eLife.06492.016 [file elife06492s003.xlsx]

## Sheet: Fig. 6 - Source Data 2
	Figure 6 - Source Data 2
	Mutation	amino acid in
		each background			AE/	T-test[a]
		AE		wtPTE	wtPTE[a]	p-value
	p135S	p		p	3.1	2.1×10-4
	y156H	y		y	1.2	0.13
	g174D	g		g	1.3	2.1×10-4
	a203E	a		a	2.4	2.4×10-7
	s258N	s		s	3.2	2.3×10-5
	m293K	m		m	1.4	0.16
	s308C	s		s	6.6	4.5×10-5
	V/l130M	V		/	7.4	1.7×10-6
	I/f306M	I		f	10	5.8×10-8
