# Supplementary material for: Reverse evolution leads to genotypic incompatibility despite functional and active site convergence
Source: eLife. 2015 Aug 14;4:e06492. doi: 10.7554/eLife.06492 (PMC4579389; doi:10.7554/eLife.06492)
Supplement: Figure 7—source data 1. — Fold-changes between the two backgrounds as well as p-values calculated according to the t-test are given. [a] Only mutations with an average >1.3-fold difference between backgrounds and a p-value <0.05 are considered significant. Non-significant values are underlined. DOI: http://dx.doi.org/10.7554/eLife.06492.018 [file elife06492s004.xlsx]

## Sheet: Fig. 7 - Source Data 1
							Figure 7 - Source Data 1
							Mutation	amino acid in
								each background			AE/	T-test[a]
								AE		neoPTE	neoPTE[a]	p-value
							T102s	T		T	2.8	1.5×10-4
							T137s	T		T	2.3	1.4×10-4
							I138m	I		I	2.4	1.5×10-4
							V144e	V		V	1.1	0.45
							E233d	E		E	9.6	3.9×10-9
							M272l	M		M	2.8	8.6×10-4
							F313i	F		F	8.7	8.7×10-6
							I341t	I		I	1.7	4.2×10-3
							V/M130l	V		M	5.2	5.7×10-6
							I/M306f	I		M	1.1	0.19
