# Supplementary figures and images for: Reverse evolution leads to genotypic incompatibility despite functional and active site convergence
Source: eLife journal article supplement (doi:10.7554/elife.06492), 2015-08-14

Figure 1 - figure supplement 1

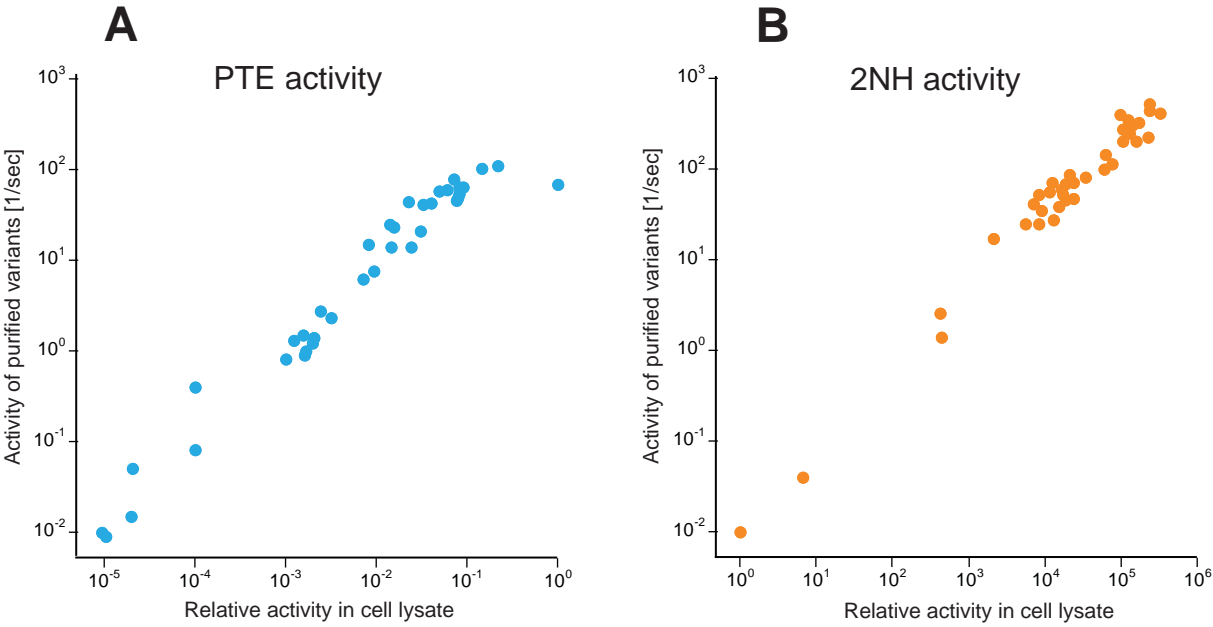

Supplement: supp [file elife_poa_e06492_Figure_1_figure_supplement_1.pdf › elife_poa_e06492_Figure_1_figure_supplement_1.pdf]

Figure 2 - figure supplement 1

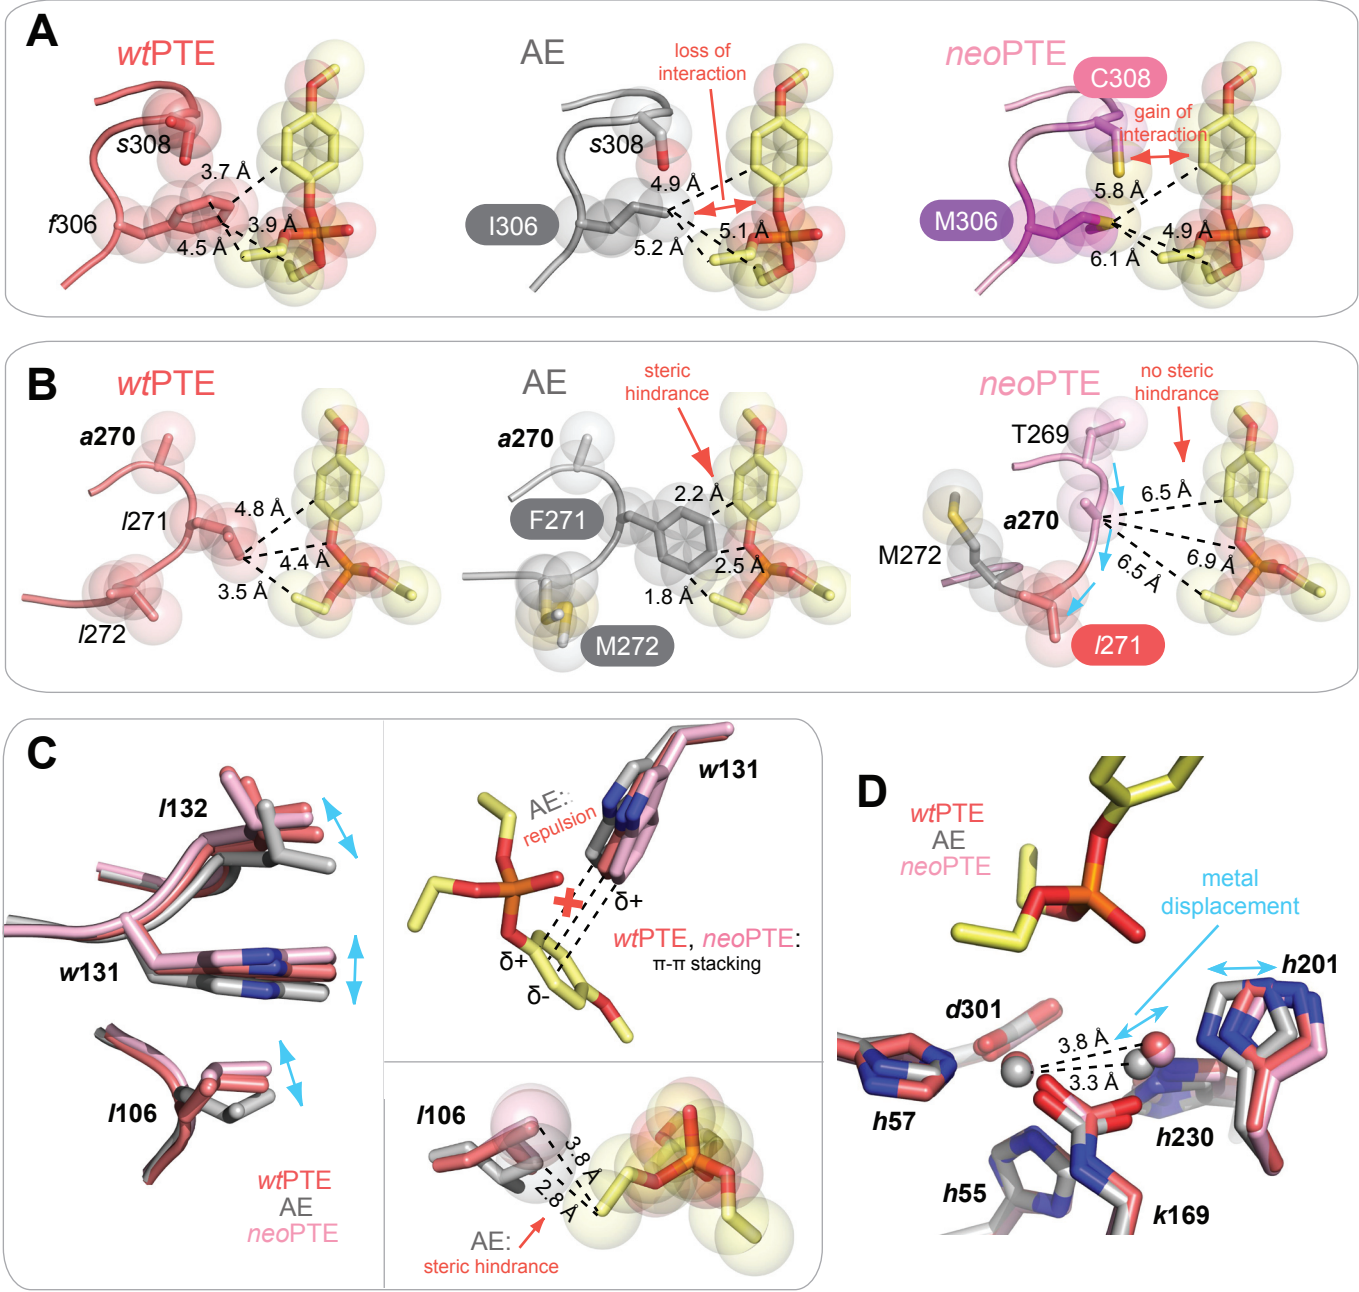

Supplement: supp [file elife_poa_e06492_Figure_2_figure_supplement_1.pdf › elife_poa_e06492_Figure_2_figure_supplement_1.pdf]

Figure 2 - figure supplement 2

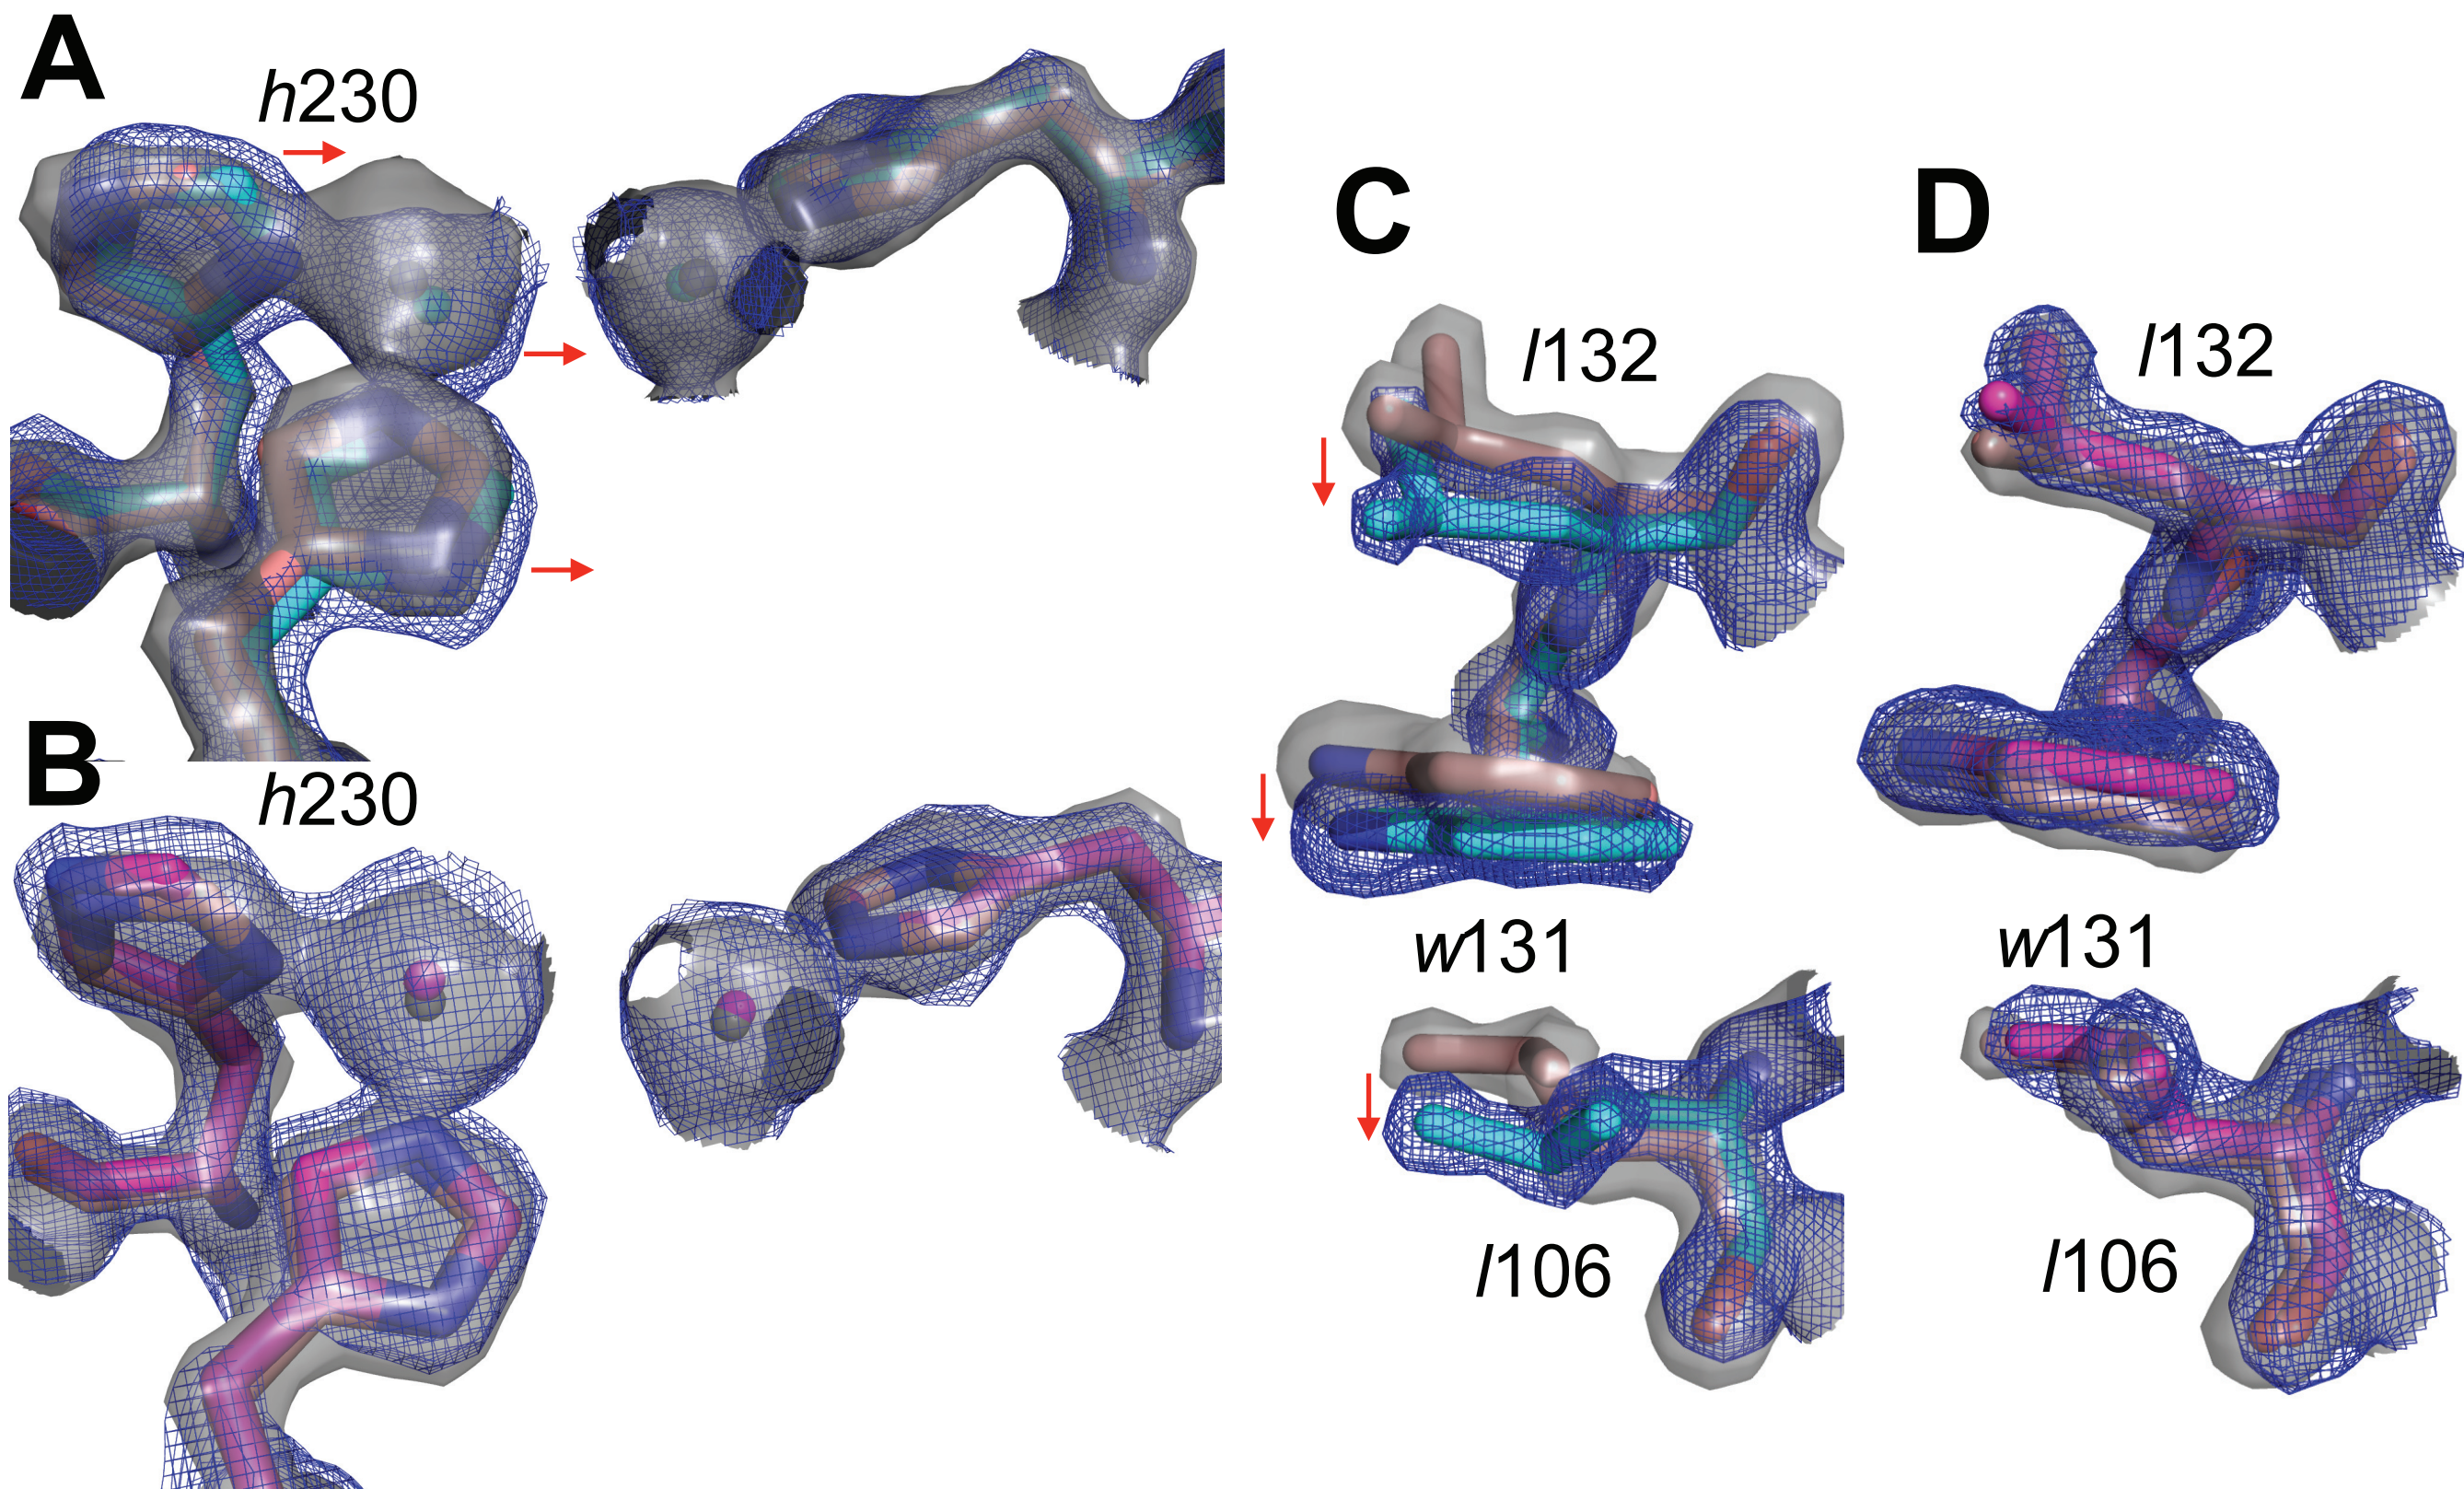

Supplement: supp [file elife_poa_e06492_Figure_2_figure_supplement_2.pdf › elife_poa_e06492_Figure_2_figure_supplement_2.pdf]

Figure 2 - figure supplement 3

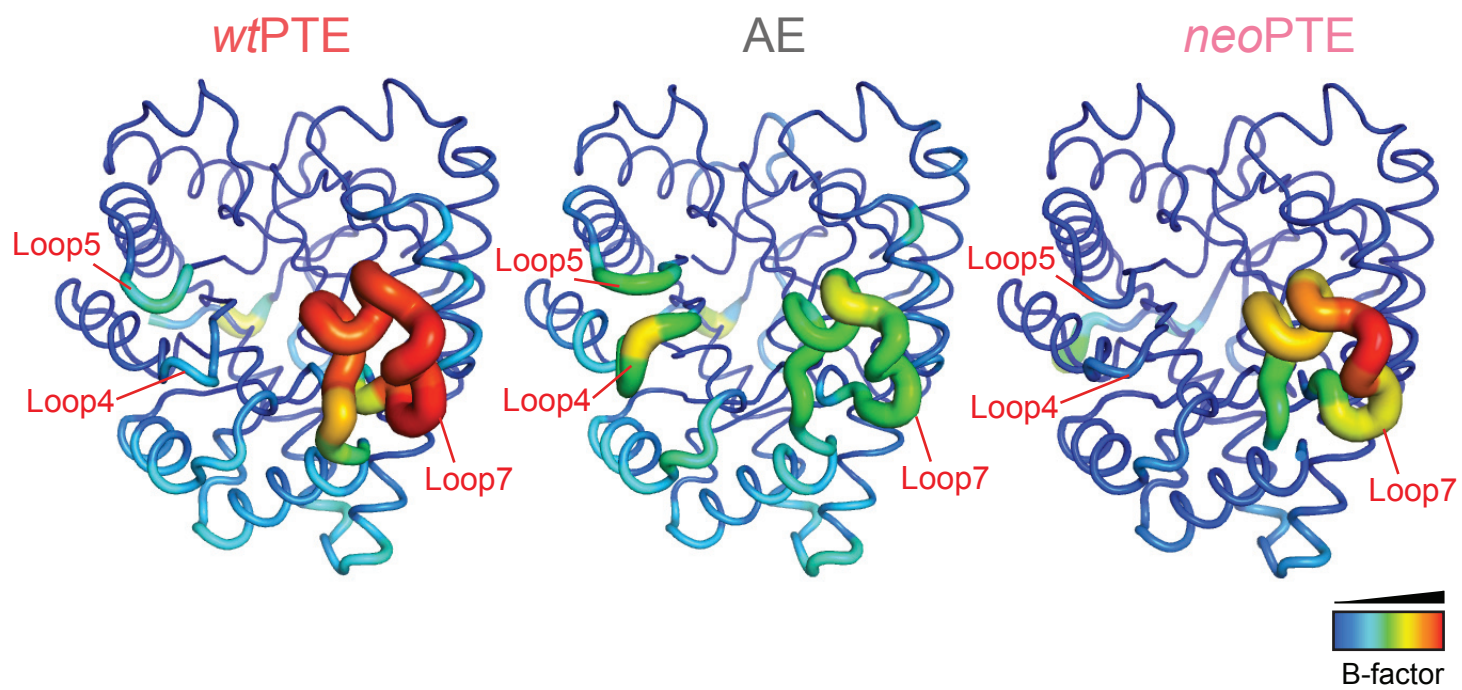

Supplement: supp [file elife_poa_e06492_Figure_2_figure_supplement_3.pdf › elife_poa_e06492_Figure_2_figure_supplement_3.pdf]

Figure 2 - figure supplement 4

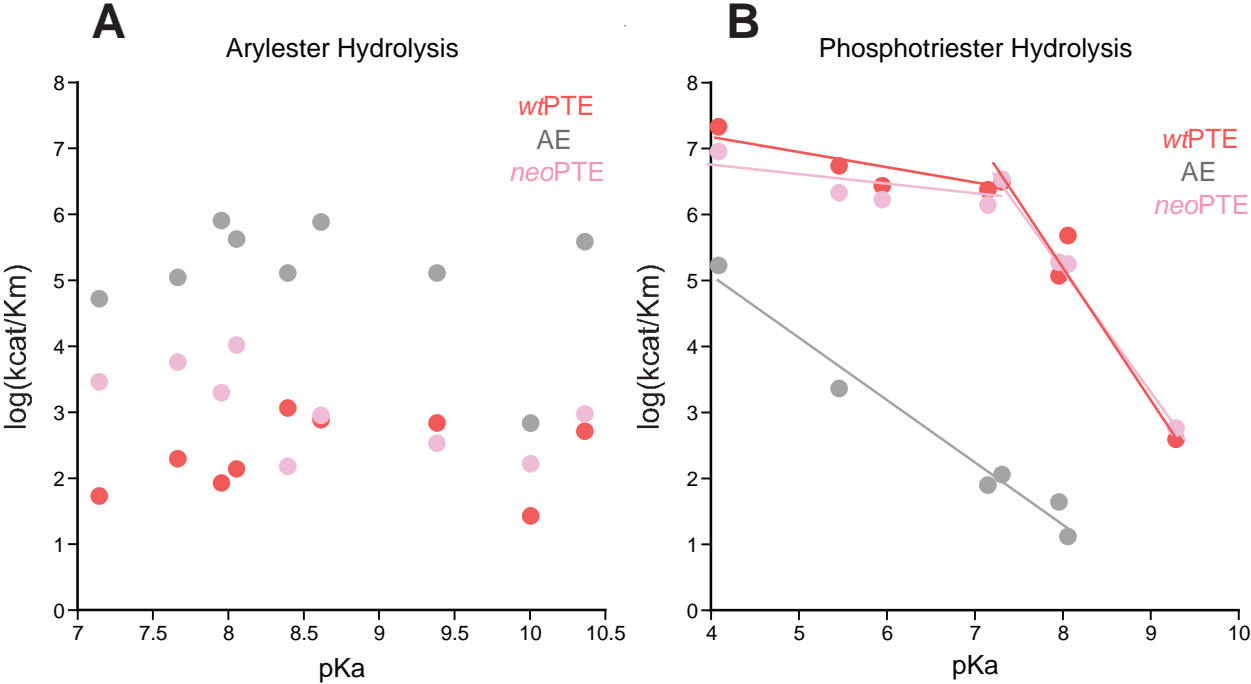

Supplement: supp [file elife_poa_e06492_Figure_2_figure_supplement_4.pdf › elife_poa_e06492_Figure_2_figure_supplement_4.pdf]
